# Supplementary material
Source: publisher figshare collection journal article supplement (https://geolsoc.figshare.com/ndownloader/files/26130773)
Supplement: Supplementary file 1 [file 26130773]

## Sheet: Plan1
Table S3: Result of fluid inclusion analysis
Sample	Field	Nº fluid inclusion	TE	Tmice	Vv/Vt	Thtotal (Líq)	D	H2O	Na+	Cl-	Vmeasured	Salinity
05A	1A	1	-45	-5.7	0.1	133.1	0.985769	0.944478	0.027761	0.027761	9.68	8.94
05A	1A	2	-47.2	-5.6	0.1	150.8	0.973175	0.945328	0.027336	0.027336	10.71	8.81
05A	1A	3	-50	-4.3	0.08	116.1	0.985605	0.956769	0.021615	0.021615	7.93	6.97
05A	1A	4	-52	-5.3	0.1	X		0.947903	0.026049	0.026049		8.39
05A	1A	5	-50.2	-5.1	0.1	166.8	0.957345	0.949641	0.02518	0.02518	11.57	8.12
05A	1A	6	-51	-5.3	0.08	88.8	1.00833	0.947903	0.026049	0.026049	7.11	8.39
05A	1A	8	-46.8	-5.8	0.1	149.1	0.975903	0.943632	0.028184	0.028184	10.7	9.08
05A	1A	9	-48	-4.1	0.1	152.3	0.959896	0.958595	0.020702	0.020702	10.07	6.68
05A	1A	10	-47	-1.2	0.05	107.5	0.96621	0.98703	0.006485	0.006485	5.24	2.1
05A	1A	11	-47.5	-5.2	0.1	143	0.975434	0.94877	0.025615	0.025615	10.02	8.26
05A	1A	12	-50	-3.7	0.1	X		0.962302	0.018849	0.018849		6.08
05A	1A	13	-49.1	-3.4	0.1	128.5	0.970753	0.965128	0.017436	0.017436	8.1	5.63
05A	1A	14	-49	-5.4	0.1	150.4	0.971891	0.94704	0.02648	0.02648	10.59	8.53
05A	1A	15	-50.4	-5.3	0.1	150.1	0.971314	0.947903	0.026049	0.026049	10.52	8.39
05A	1A	16	-50.7	-4.9	0.1	152.6	0.96633	0.951396	0.024302	0.024302	10.49	7.83
05A	1A	17	-48.1	-5.2	0.1	140.8	0.976918	0.94877	0.025615	0.025615	9.88	8.26
05A	1A	18	-49.6	-5.3	0.1	X		0.947903	0.026049	0.026049		8.39
05A	1A	19	-49	-5.1	0.1	X		0.949641	0.02518	0.02518		8.12
05A	1A	20	-49.4	-5.4	0.1	X		0.94704	0.02648	0.02648		8.53
05A	1A	21	-49.7	-3.8	0.1	160.8	0.95074	0.961368	0.019316	0.019316	10.53	6.23
05A	1A	22	-47.4	-4.9	0.12	177.1	0.947339	0.951396	0.024302	0.024302	12.25	7.83
05A	1A	23	-49.9	-3.7	0.1	X		0.962302	0.018849	0.018849		6.08
05A	1A	24	-47.8	-5.6	0.1	143.2	0.978391	0.945328	0.027336	0.027336	10.23	8.81
05A	1A	25	-49.1	-4.3	0.08	108	0.99032	0.956769	0.021615	0.021615	7.48	6.97
05A	1A	26	-48.4	-4.3	0.1	X		0.956769	0.021615	0.021615		6.97
05A	1A	27	-48.3	-4.5	0.1	X		0.954961	0.02252	0.02252		7.26
05A	1A	28	-45.6	-2.3	0.08	131.5	0.959477	0.97583	0.012085	0.012085	7.6	3.91
05A	1A	29	-50.2	-5.1	0.12	146.8	0.97204	0.949641	0.02518	0.02518	10.21	8.12
05A	1A	30	-48	-5.4	0.12	153.8	0.969481	0.94704	0.02648	0.02648	10.81	8.53
05A	1A	31	-52.1	-1.7	0.05	112.3	0.967279	0.981883	0.009059	0.009059	5.93	2.93
05A	1A	32	-49.6	-2.5	0.05	114.6	0.972348	0.973846	0.013077	0.013077	6.65	4.23
05A	1A	33	-50.1	-5.1	0.08	106.6	0.997173	0.949641	0.02518	0.02518	7.89	8.12
05A	1A	34	-47.7	-4.9	0.1	149.6	0.968478	0.951396	0.024302	0.024302	10.29	7.83
05A	1A	35	-47.9	-5.4	0.1	165.2	0.961069	0.94704	0.02648	0.02648	11.59	8.53
05A	1A	36	-50.8	-4.3	0.05	83.1	1.00357	0.956769	0.021615	0.021615	6.25	6.97
05A	1A	37	-48.4	-5.8	0.12	155.2	0.971624	0.943632	0.028184	0.028184	11.09	9.08
05A	1A	38	-48.8	-5.7	0.1	151.7	0.973322	0.944478	0.027761	0.027761	10.82	8.94
05A	1A	39	-47.7	-5.2	0.1	140	0.977453	0.94877	0.025615	0.025615	9.83	8.26
05A	1A	40	-49.8	-5.5	0.12	151.2	0.972113	0.946182	0.026909	0.026909	10.69	8.67
05A	1A	41	-49.1	-5.7	0.12	147.5	0.976236	0.944478	0.027761	0.027761	10.55	8.94
05A	1A	42	-50.6	-5	0.1	151.4	0.968001	0.950516	0.024742	0.024742	10.46	7.98
05A	1A	43	-48.6	-5.4	0.1	152.1	0.970692	0.94704	0.02648	0.02648	10.7	8.53
05A	1A	44	-51.5	-4.3	0.12	152	0.961809	0.956769	0.021615	0.021615	10.15	6.97
05A	1A	45	-49.5	-4.4	0.1	151.7	0.962867	0.955863	0.022069	0.022069	10.18	7.12
05A	1B	1	-49.8	-5.3	0.1	162.2	0.962519	0.947903	0.026049	0.026049	11.33	8.39
05A	1B	2	-48.1	-5.6	0.08	X		0.945327	0.027336	0.027336		8.81
05A	1B	3	-49.5	-5.6	0.09	149.4	0.974151	0.945328	0.027336	0.027336	10.62	8.81
05A	1B	4	-47.9	-2.8	0.09	149.2	0.950794	0.970901	0.01455	0.01455	9.15	4.7
05A	1B	5	-49.1	-1.8	0.09	X		0.980864	0.009568	0.009568		3.09
05A	1B	6	-49.5	-5.8	0.08	X		0.943632	0.028184	0.028184		9.08
05A	1B	7	-48.4	-4.7	0.08	X		0.95317	0.023415	0.023415		7.55
05A	1B	8	-47.1	-5.4	0.09	X		0.94704	0.02648	0.02648		8.53
05A	1B	9	-49.7	-5.1	0.1	X		0.949641	0.02518	0.02518		8.12
05A	1B	11	-49.3	-5.6	0.1	161.4	0.965543	0.945328	0.027336	0.027336	11.41	8.81
05A	1B	12	-50.1	-5.9	0.1	X		0.942791	0.028605	0.028605		9.21
05A	1B	13	-49.7	-4.2	0.1	X		0.95768	0.02116	0.02116		6.83
05A	1B	14	-49.9	-5.6	0.1	148.6	0.974706	0.945328	0.027336	0.027336	10.57	8.81
05A	1B	15	-49.5	-6.3	0.08	105.9	1006567	0.939467	0.030266	0.030266	8.49	9.74
05A	1B	16	-49.1	-3.8	0.08	137.6	0.967902	0.961368	0.019316	0.019316	8.92	6.23
05A	1B	17	-48	-1.3	0.05	99.1	0.972085	0.985994	0.007003	0.007003	4.83	2.26
05A	1B	18	-48.7	-1.7	0.1	156.9	0.933849	0.981883	0.009059	0.009059	9.18	2.93
05A	1B	19	-49.5	-1.6	0.08	139.1	0.947566	0.982905	0.008547	0.008547	7.69	2.76
05A	1B	20	-49.8	-4.1	0.08	117.9	0.982982	0.958595	0.020702	0.020702	7.9	6.68
05A	1B	21	-48.2	-6.3	0.1	155.4	0.975324	0.939467	0.030266	0.030266	11.33	9.74
05A	1B	22	-48.4	-5.2	0.09	114.9	0.993155	0.948769	0.025615	0.025615	8.39	8.26
05A	1B	23	-50.2	-5.9	0.1	147.1	0.97804	0.942791	0.028605	0.028605	10.62	9.21
05A	1B	24	-49.8	-5.4	0.1	X		0.94704	0.02648	0.02648		8.53
05A	1B	25	-48.7	-5.8	0.1	160.4	0.967869	0.943632	0.028184	0.028184	11.44	9.08
05A	1B	26	-49.5	-3.7	0.1	154.1	0.955077	0.962302	0.018849	0.018849	9.99	6.08
05A	1B	27	-50.8	-5.4	0.09	144.7	0.975834	0.94704	0.02648	0.02648	10.23	8.53
05A	1B	28	-50.1	-5.7	0.09	126.2	0.990103	0.944478	0.027761	0.027761	9.28	8.94
05A	1B	29	-48	-6	0.1	143.1	0.981496	0.941954	0.029023	0.029023	10.42	9.35
05A	1B	30	-50.6	-2.5	0.08	135.4	0.958436	0.973846	0.013077	0.013077	7.99	4.23
05A	1B	31	-49.2	-5.8	0.09	159.4	0.968599	0.943632	0.028184	0.028184	11.37	9.08
05A	1B	32	-51.8	-5.6	0.12	151.6	0.972614	0.945328	0.027336	0.027336	10.76	8.81
05A	1B	33	-48.9	-5.9	0.1	157.5	0.970757	0.942791	0.028605	0.028605	11.29	9.21
05A	1B	34	-49.8	-6	0.1	152.8	0.974864	0.941954	0.029023	0.029023	11.03	9.35
05A	1B	35	-50.8	-5.7	0.1	114.2	0.997312	0.944478	0.027761	0.027761	8.62	8.94
05A	1B	36	-47.4	-5.6	0.05	~78,1	1016155	0.945327	0.027336	0.027336	6.77	8.81
05A	1B	37	-50.8	-3.1	0.05	X		0.967995	0.016003	0.016003		5.17
05A	1B	38	-48.4	-8.7	0.12	158.4	0.990482	0.920854	0.039573	0.039573	12.52	12.71
05A	1B	39	-49.9	-6.6	0.12	153.6	0.978838	0.937018	0.031491	0.031491	11.35	10.14
05A	1B	40	-48.1	-1.9	0.08	128.3	0.958263	0.979849	0.010075	0.010075	7.11	3.26
05A	N	1	-38.8	-7.1	0.1	135.5	0.99454	0.933016	0.033492	0.033492	10.49	10.78
05A	N	2	-45.2	-3.5	0.08	130.8	0.970045	0.964181	0.017909	0.017909	8.3	5.78
05A	N	3	-44.6	-8.3	0.1	139	1000790	0.923806	0.038097	0.038097	11.21	12.24
05A	N	4 (	-44.3	-2.8	0.08	135.9	0.960677	0.970901	0.01455	0.01455	8.21	4.7
05A	N	5	-45.6	-2.6	0.08	127.6	0.964735	0.97286	0.01357	0.01357	7.53	4.38
05A	N	6	-44.7	-9.6	0.1	134	1013057	0.914415	0.042792	0.042792	11.41	13.74
05A	N	7	-41.5	-6	0.1	150.3	0.976604	0.941954	0.029023	0.029023	10.87	9.35
05A	N	8	-43	-5	0.1	134.4	0.979597	0.950516	0.024742	0.024742	9.39	7.98
05A	N	9	-41.6	-7.8	0.06	X		0.927578	0.036211	0.036211		11.64
05A	N	10	-53.4	-5.8	0.08	120.8	0.994141	0.943632	0.028184	0.028184	9.03	9.08
05A	N	11	-42.8	-5.7	0.1	X		0.944478	0.027761	0.027761		8.94
05A	N	12	-43.7	-7.5	0.1	139.6	0.99476	0.929886	0.035057	0.035057	10.91	11.27
05A	N	13	-42.2	-6.2	0.1	X		0.940292	0.029854	0.029854		9.61
05A	N	14	-42.8	-6.6	0.1	132.8	0.99263	0.937018	0.031491	0.031491	10.11	10.14
05A	N	15	-52.6	-6.8	0.1	148	0.984149	0.935405	0.032297	0.032297	11.1	10.39
05A	N	16	-40.3	-2.7	0.08	131.7	0.96277	0.971878	0.014061	0.014061	7.87	4.54
05A	N	17	-50	-6.4	0.1	154.4	0.976782	0.938647	0.030677	0.030677	11.32	9.88
05A	N	18	-49.8	-6.1	0.1	151	0.97688	0.941121	0.02944	0.02944	10.96	9.48
05A	N	19	-50.7	-6.1	0.07	X		0.941121	0.02944	0.02944		9.48
05A	N	20	-52.8	-6.2	0.1	149.7	0.978533	0.940292	0.029854	0.029854	10.93	9.61
05A	N	21	-49.1	-5.9	0.1	133.1	0.987268	0.942791	0.028605	0.028605	9.78	9.21
05A	N	22	-47.3	-5.8	0.1	149	0.975972	0.943632	0.028184	0.028184	10.69	9.08
05A	N	24	-46.8	-5.2	0.08	135.1	0.980682	0.94877	0.025615	0.025615	9.54	8.26
05B	1 (T)	1	-51.6	-7.7	0.08	111.7	1013562	0.928343	0.035828	0.035828		11.52
05B	1 (T)	2	-52.1	-4.4	0.05	70.2	1010585	0.955863	0.022069	0.022069	5.73	7.12
05B	1 (T)	3	-52.6	-9.3	0.08	88.2	1040035	0.916531	0.041735	0.041735	8.76	13.4
05B	1 (T)	4	-53.4	-9.2	0.08	91.1	1037431	0.917243	0.041379	0.041379	8.89	13.29
05B	1 (T)	5	-51	-9	0.08	81.8	1041534	0.918677	0.040662	0.040662	8.32	13.06
05B	1 (T)	6	-51.2	-6.5	0.06	X		0.93783	0.031085	0.031085		10.01
05B	1 (T)	7	-50.8	-9.4	0.1	X		0.915822	0.042089	0.042089		13.51
05B	1 (T)	8	-50.7	-9.1	0.1	117.2	1020383	0.917958	0.041021	0.041021	10.29	13.17
05B	1 (T)	9	-51.9	-9	0.09	93.8	1034185	0.918677	0.040662	0.040662	8.97	13.06
05B	1 (T)	10	-50.8	-8.8	0.09	X		0.920125	0.039938	0.039938		12.83
05B	1 (T)	11	-49.7	-9.5	0.08	87.5	1042095	0.915117	0.042442	0.042442	8.78	13.63
05B	1 (T)	12	-51.2	-5.4	0.08	87.8	1009618	0.94704	0.02648	0.02648	7.12	8.53
05B	1 (T)	13	-51.1	-9	0.08	86.9	1038414	0.918677	0.040662	0.040662	8.6	13.06
05B	1 (T)	14	-48.6	-3.2	0.05	90.3	0.991545	0.967035	0.016483	0.016483	5.84	5.32
05B	1 (T)	15	-52.5	-7.6	0.08	76.6	1033027	0.929112	0.035444	0.035444	7.59	11.4
05B	1 (T)	16	-56.3	-8.6	0.08	98.4	1028280	0.921587	0.039207	0.039207	9.08	12.6
05B	1 (T)	17	-54.9	-2.5	0.08	135.2	0.95858	0.973846	0.013077	0.013077	7.98	4.23
05B	1 (T)	18	-53.2	-3.8	0.05	97.4	0.992373	0.961368	0.019316	0.019316	6.61	6.23
05B	1 (T)	19	-49.9	-8.8	0.1	97	1030670	0.920125	0.039938	0.039938	9.08	12.83
05B	1 (T)	20	-49.7	-6.3	0.1	133.7	0.989855	0.939467	0.030266	0.030266	10.01	9.74
05B	1 (T)	21	-51.3	-9	0.1	134.1	1008847	0.918677	0.040662	0.040662	11.2	13.06
05B	1 (T)	22	-55.8	-8.6	0.08	81	1038715	0.921587	0.039207	0.039207	8.16	12.6
05B	1 (T)	23	-52	-8.7	0.08	96.1	1030443	0.920854	0.039573	0.039573	9	12.71
05B	1 (T)	25	-56.7	-6.1	0.08	131	0.990086	0.941121	0.02944	0.02944	9.76	9.48
05B	1 (T)	26	-60.9	-9.7	0.08	85.2	1045192	0.913716	0.043142	0.043142	8.7	13.85
05B	1 (T)	27	-62	-9.2	0.1	132.3	1011407	0.917243	0.041379	0.041379	11.17	13.29
05B	1 (T)	28	-62.6	-5.7	0.08	92.6	1009380	0.944478	0.027761	0.027761	7.51	8.94
05B	1 (T)	29	-58.9	-7	0.1	131.5	0.996359	0.933809	0.033096	0.033096	10.22	10.65
05B	1 (T)	30	-54.5	-1.6	0.08	131.8	0.953089	0.982905	0.008547	0.008547	7.15	2.76
05B	1 (T)	31	-51.7	-5.6	0.05	108.9	0.976611	0.97286	0.01357	0.01357	6.39	4.38
05B	4	1	-44.5	-5.4	0.1	140	0.978997	0.94704	0.02648	0.02648	9.94	8.53
06B	1	1	-54.7	-5.7	0.1	148.1	0.975824	0.944478	0.027761	0.027761	10.59	8.94
06B	1	2	-53.1	-6	0.1	157.8	0.971318	0.941954	0.029023	0.029023	11.35	9.35
06B	1	3	-54.1	-5.9	0.08	112.1	1.00003	0.942791	0.028605	0.028605	8.61	9.21
06B	1	4	-53.5	-5.8	0.08	104.2	1003783	0.943632	0.028184	0.028184	8.15	9.08
06B	1	5	-54.2	-6	0.1	158.5	0.970814	0.941954	0.029023	0.029023	11.4	9.35
06B	1	6	-53.3	-5.7	0.1	148.6	0.975479	0.944478	0.027761	0.027761	10.62	8.94
06B	1	7	-55.5	-5.3	0.1	159.4	0.964606	0.947903	0.026049	0.026049	11.14	8.39
06B	1	8	-50.6	-5.8	0.08	106.6	1002431	0.943632	0.028184	0.028184	8.27	9.08
06B	1	9	-50.3	-5.8	0.1	135.8	0.984787	0.943632	0.028184	0.028184	9.89	9.08
06B	1	10	-50.9	-6.1	0.1	137.7	0.9858	0.941121	0.02944	0.02944	10.15	9.48
06B	1	11	-51	-5.4	0.08	120.7	0.991211	0.94704	0.02648	0.02648	8.81	8.53
06B	1	12	-50.5	-5.5	0.1	137.2	0.981607	0.946182	0.026909	0.026909	9.82	8.67
06B	1	13	-54.6	-5.9	0.1	127.7	0.990665	0.942791	0.028605	0.028605	9.47	9.21
06B	1	14	-49.7	-1.6	0.12	X		0.982905	0.008547	0.008547		2.76
06B	1	15	-51.6	-5.6	0.1	124.9	0.990155	0.945328	0.027336	0.027336	9.16	8.81
06B	1	16	-52.4	-6	0.1	123.8	0.993809	0.941954	0.029023	0.029023	9.3	9.35
06B	1	17	-51	-6	0.1	124.4	0.993442	0.941954	0.029023	0.029023	9.33	9.35
06B	1	18	-52.5	-6.1	0.12	153.9	0.974857	0.941121	0.02944	0.02944	11.15	9.48
06B	1	19	-52.8	-6	0.12	153.3	0.974513	0.941954	0.029023	0.029023	11.06	9.35
06B	1	20	-48.9	-5.9	0.1	149.6	0.97804	0.942791	0.028605	0.028605	10.62	9.21
06B	1	21	-51.9	-5.9	0.1	147.1	0.97804	0.942791	0.028605	0.028605	10.62	9.21
06B	1	22	-51.2	-6	0.1	150.5	0.976465	0.941954	0.029023	0.029023	10.88	9.35
06B	1	23	-51.9	-5.9	0.12	161.4	0.967924	0.942791	0.028605	0.028605	11.55	9.21
06B	1	24	-50.1	-5.5	0.12	161.4	0.96474	0.946182	0.026909	0.026909	11.37	8.67
06B	1	25	-49.5	-6.1	0.12	160.4	0.970215	0.941121	0.02944	0.02944	11.57	9.48
06B	1	26	-50.7	-5.9	0.08	103.6	1004870	0.942791	0.028605	0.028605	8.17	9.21
06B	1	27	-49.7	-6.1	0.08	100.5	1008104	0.941121	0.02944	0.02944	8.12	9.48
06B	1	28	-50.4	-6.1	0.08	109.6	1002959	0.941121	0.02944	0.02944	8.59	9.48
06B	1	29	-48.6	-4.9	0.08	110.1	0.993676	0.951396	0.024302	0.024302	7.96	7.83
06B	1	30	-51.6	-3.1	0.08	139	0.961045	0.967995	0.016003	0.016003	8.6	5.17
06B	1	31	-52.9	-5.8	0.1	X		0.943632	0.028184	0.028184		9.08
06B	1	32	-51.6	-5.5	0.08	X		0.946182	0.026909	0.026909		8.67
06B	1	33	-53.3	-5.8	0.08	115.3	0.997413	0.943632	0.028184	0.028184	8.73	9.08
06B	1	34	-50.8	-5.4	0.1	145.7	0.975151	0.94704	0.02648	0.02648	10.29	8.53
06B	1	35	-48	-3.8	0.08	114.7	0.982575	0.961368	0.019316	0.019316	7.54	6.23
06B	1	36	-48.3	-5.8	0.08	87.9	1012643	0.943632	0.028184	0.028184	7.34	9.08
06B	1	37	-51.4	-5.7	0.08	133.8	0.985321	0.944478	0.027761	0.027761	9.72	8.94
06B	1	38	-53.1	-6.3	0.1	142.9	0.983873	0.939467	0.030266	0.030266	10.56	9.74
06B	1	39	-50.7	-3.7	0.08	93.1	0.993895	0.962302	0.018849	0.018849	6.33	6.08
06B	1	40	-51.9	-6.5	0.1	134.4	0.99088	0.93783	0.031085	0.031085	10.15	10.01
06B	1	41	-51	-1.8	0.05	117	0.965084	0.980864	0.009568	0.009568	6.3	3.09
06B	1	42	-53.6	-2.5	0.08	131.5	0.961201	0.973846	0.013077	0.013077	7.72	4.23
06B	1	43	-52.7	-1.4	0.08	X		0.984961	0.00752	0.00752		2.43
06B	1	44	-48.7	-1.5	0.08	132.1	0.951966	0.983931	0.008034	0.008034	7.11	2.6
06B	1	45	-51.2	-5.6	0.08	132.5	0.985399	0.945328	0.027336	0.027336	9.59	8.81
06B	1	46	-53.8	-1.8	0.08	144.2	0.945433	0.980864	0.009568	0.009568	8.2	3.09
06B	1	47	-53.9	-5.5	0.1	X		0.946182	0.026909	0.026909		8.67
06B	1	48	-52.6	-5.4	0.12	X		0.94704	0.02648	0.02648		8.53
06B	1	49	-55.4	-5.6	0.08	X		0.945327	0.027336	0.027336		8.81
06B	1	50	-54.5	-4.6	0.1	X		0.954063	0.022969	0.022969		7.41
06B	1	51	-56.9	-5.9	0.08	X		0.942791	0.028605	0.028605		9.21
06B	1	52	-51.1	-5.8	0.1	X		0.943632	0.028184	0.028184		9.08
06B	1	53	-54.5	-5.8	0.12	X		0.943632	0.028184	0.028184		9.08
06B	G	1	-45.5	-6.2	0.1	159.2	0.971855	0.940292	0.029854	0.029854	11.54	9.61
06B	G	2	-47	-6.1	0.1	156.9	0.972734	0.941121	0.02944	0.02944	11.34	9.48
06B	G	3	-47.2	-5.3	0.1	161.6	0.962969	0.947903	0.026049	0.026049	11.29	8.39
06B	G	4	-44.3	-5.5	0.1	165.2	0.961887	0.946182	0.026909	0.026909	11.63	8.67
06B	G	5	-39.2	-4.2	0.1	164.1	0.951688	0.95768	0.02116	0.02116	10.97	6.83
06B	G	6	-39.4	-4.9	0.1	164.8	0.957207	0.951396	0.024302	0.024302	11.33	7.83
06B	G	7	-44.4	-5.6	0.08	213.9	0.920524	0.945328	0.027336	0.027336	15.54	8.81
06B	G	8	-43.4	-5.8	0.1	X		0.943632	0.028184	0.028184		9.08
06B	G	10	-49.7	-5.9	0.1	155.7	0.972045	0.942791	0.028605	0.028605	11.17	9.21
06B	G	11	-38.2	-5.9	0.1	162.9	0.966819	0.942791	0.028605	0.028605	11.65	9.21
06B	G	12	-40.6	-5.6	0.1	166.3	0.961866	0.945328	0.027336	0.027336	11.75	8.81
06B	G	13	-41.7	-5.6	0.1	156.7	0.96898	0.945328	0.027336	0.027336	11.1	8.81
06B	G	14	-40.7	-6.3	0.1	163.7	0.969355	0.939467	0.030266	0.030266	11.88	9.74
06B	G	15	-38.9	-6	0.1	158.7	0.97067	0.941954	0.029023	0.029023	11.41	9.35
06B	G	16	-39.1	-5.3	0.08	124	0.988452	0.947903	0.026049	0.026049	8.94	8.39
06B	G	17	-37.3	-4.2	0.08	X		0.95768	0.02116	0.02116		6.83
06B	G	18	-36.7	-4.4	0.1	X		0.955863	0.022069	0.022069		7.12
06B	G	19	-38	-5.7	0.1	164.6	0.963959	0.944478	0.027761	0.027761	11.68	8.94
06B	G	20	-39.2	-5.5	0.1	147.4	0.97476	0.946182	0.026909	0.026909	10.45	8.67
06B	G	21	-38	-5.9	0.1	149.9	0.976117	0.942791	0.028605	0.028605	10.8	9.21
06B	G	22	-36.7	-5.4	0.1	154.3	0.969123	0.94704	0.02648	0.02648	10.84	8.53
06B	G	23	-39.5	-6	0.1	147.8	0.978322	0.941954	0.029023	0.029023	10.71	9.35
06B	G	24	-37.8	-3.7	0.1	157.7	0.952289	0.962302	0.018849	0.018849	10.25	6.08
06B	G	25	-47.3	-5.4	0.1	151.1	0.971399	0.94704	0.02648	0.02648	10.64	8.53
26D	A	1	-41.1	-2.5	0.1	135.8	0.958148	0.973846	0.013077	0.013077	8.02	4.23
26D	A	2	-46.9	-2.2	0.1	129.5	0.96002	0.976829	0.011585	0.011585	7.39	3.74
26D	A	3	-47.5	-2.5	0.08	136.1	0.957932	0.973846	0.013077	0.013077	8.04	4.23
26D	A	4	-47.3	-2.7	0.08	X		0.971878	0.014061	0.014061		4.54
26D	A	5	-46.9	-3.8	0.08	122.2	0.977997	0.961368	0.019316	0.019316	7.97	6.23
26D	A	6	-44.5	-2.4	0.07	147.6	0.948366	0.974836	0.012582	0.012582	8.81	4.07
26D	A	7	-45.9	-2.3	0.1	106.1	0.975894	0.97583	0.012085	0.012085	6.01	3.91
26D	A	8	-46.5	-2.5	0.07	150	0.9474	0.973846	0.013077	0.013077	9.05	4.23
26D	A	9	-47.5	-2.6	0.07	152	0.94674	0.97286	0.01357	0.01357	9.26	4.38
26D	A	10	-39	-3.6	0.09	151.3	0.95633	0.963239	0.01838	0.01838	9.74	5.93
26D	A	11	-40.2	-3.2	0.06	143.4	0.958723	0.967035	0.016483	0.016483	8.96	5.32
26D	A	13	-40.9	0.4	0.1	138.4	0.930233	1	0	0	6.8	0
26D	A	14	-38.4	-3.3	0.08	136.8	0.964297	0.966079	0.01696	0.01696	8.57	5.48
26D	A	15	-48.1	-2.3	0.08	124.9	0.964034	0.97583	0.012085	0.012085	7.16	3.91
26D	A	16	-44.9	-2.3	0.08	161.7	0.935737	0.97583	0.012085	0.012085	9.88	3.91
26D	A	17	-44.7	-2.2	0.1	139.2	0.952988	0.976829	0.011585	0.011585	8.07	3.74
26D	F	1	-39.1	-2.3	0.1	172.5	0.925997	0.97583	0.012085	0.012085	10.82	3.91
26D	F	2	-38.8	-0.6	0.08	146	0.932132	0.993309	0.003346	0.003346	7.64	1.08
26D	F	3	-40.4	-1.9	0.1	164.5	0.929137	0.979849	0.010075	0.010075	9.93	3.26
26D	F	4	-38.5	-2	0.08	X		0.978839	0.010581	0.010581		3.42
26D	F	5	-45.8	-2.2	0.1	162.8	0.933762	0.976829	0.011585	0.011585	9.93	3.74
26D	F	7	-36.9	-2.1	0.08	148.2	0.945076	0.977832	0.011084	0.011084	8.69	3.58
26D	F	8	-34.5	-2.2	0.1	158	0.937927	0.976829	0.011585	0.011585	9.52	3.74
26D	F	9	-34.8	-1.7	0.07	X		0.981883	0.009059	0.009059		2.93
26D	F	10	-44.6	-0.7	0.05	114.1	0.957743	0.992256	0.003872	0.003872	5.27	1.25
26D	F	11	-40.9	-0.1	0.08	161.2	0.91245	0.998565	0.000718	0.000718	8.8	0.23
26D	F	12	-38.8	-2	0.1	195.2	0.89944	0.978839	0.010581	0.010581	12.96	3.42
26D	F	13	-42.7	-1.7	0.2	296.4	0.74027	0.981883	0.009059	0.009059	28.01	2.93
26D	F	14	-38.7	-2	0.1	196.3	0.898222	0.978839	0.010581	0.010581	13.07	3.42
26D	F	15	-40.5	-0.6	0.2	303.4	0.697204	0.993309	0.003346	0.003346	30.92	1.08
26D	F	16	-37.3	-1.6	0.1	164.1	0.926322	0.982905	0.008547	0.008547	9.76	2.76
26D	F	17	-38.3	-1.9	0.1	191.5	0.902246	0.979849	0.010075	0.010075	12.54	3.26
26E	5	1	-39.9	-2.2	0.1	184.3	0.913388	0.976829	0.011585	0.011585	11.89	3.74
26E	5	2	-39.4	-2.2	0.1	175.7	0.921883	0.976829	0.011585	0.011585	11.07	3.74
26E	5	3	-37.5	-2.1	0.1	183.8	0.912741	0.977832	0.011084	0.011084	11.81	3.58
26E	5	4	-38.4	-1.9	0.1	187.2	0.906851	0.979849	0.010075	0.010075	12.09	3.26
26E	5	5	-36.8	-2.1	0.08	146.1	0.946751	0.977832	0.011084	0.011084	8.53	3.58
26E	5	6	-43.9	-2.1	0.08	141.7	0.950181	0.977832	0.011084	0.011084	8.19	3.58
26E	5	7	-37.4	-2.2	0.08	140.3	0.952159	0.976829	0.011585	0.011585	8.15	3.74
26E	7	1	-41.5	-2.5	0.08	141.7	0.953809	0.973846	0.013077	0.013077	8.43	4.23
26E	7	2	-43.8	-2.3	0.08	124.6	0.964236	0.97583	0.012085	0.012085	7.14	3.91
26E	7	4	-39.7	-2.6	0.07	X		0.97286	0.01357	0.01357		4.38
26E	7	5	-41.3	-2.7	0.1	156.5	0.944037	0.971878	0.014061	0.014061	9.66	4.54
26E	7	6	-39.7	-2.6	0.1	X		0.97286	0.01357	0.01357		4.38
26E	7	7	-41.6	-2.5	0.08	125.8	0.965109	0.973846	0.013077	0.013077	7.35	4.23
26E	7	8	-42.8	-1.7	0.05	126.4	0.95786	0.981883	0.009059	0.009059	6.84	2.93
26E	7	9	-38.6	-2.7	0.08	145	0.953114	0.971878	0.014061	0.014061	8.79	4.54
26E	8	5	-48.4	-1.1	0.08	141	0.941312	0.98807	0.005965	0.005965	7.53	1.93
26E	8	6	-42.6	-2.9	0.08	141.4	0.957575	0.969928	0.015036	0.015036	8.65	4.86
26E	8	7	-43.3	-2.8	0.08	129.1	0.965397	0.970901	0.01455	0.01455	7.76	4.7
26E	8	11	-44.2	-2.8	0.08	137.7	0.959391	0.970901	0.01455	0.01455	8.33	4.7
26E	8	12	-42.2	-2.5	0.08	142.2	0.953433	0.973846	0.013077	0.013077	8.47	4.23
26E	8	13	-44.8	-2.7	0.1	158.8	0.942136	0.971878	0.014061	0.014061	9.84	4.54
26E	8	16	-40.8	-3	0.1	151.6	0.950747	0.968959	0.015521	0.015521	9.44	5.01
26E	8	17	-47.9	-2.7	0.1	155.1	0.945179	0.971878	0.014061	0.014061	9.55	4.54
26E	8	19	-42.2	-3	0.1	184.8	0.921825	0.968959	0.015521	0.015521	12.2	5.01
26E	8	20	-41.8	-2.5	0.1	154.2	0.944016	0.973846	0.013077	0.013077	9.37	4.23
26E	8	24	-42.4	-2.8	0.08	124.9	0.968204	0.970901	0.01455	0.01455	7.49	4.7
28D	G	1	-50.7	-8.8	0.1	123.7	1014123	0.920125	0.039938	0.039938	10.54	12.83
28D	G	2	-59.9	-18	0.2	X		0.865191	0.067405	0.067405		21.51
28D	G	3	-56	-6.4	0.05	X	1039794	0.938647	0.030677	0.030677	5.59	9.88
28D	G	4	-57.8	-6.6	0.05	X	1041225	0.937018	0.031491	0.031491	5.7	10.14
28D	G	7	-56.7	-6	0.08	100.2	1007517	0.941954	0.029023	0.029023	8.05	9.35
28D	G	8	-58.5	-3.8	0.07	X		0.961368	0.019316	0.019316		6.23
28D	G	9	-57.5	-7	0.1	142.5	0.989273	0.933809	0.033096	0.033096	10.86	10.65
28D	G	10	-55	-8	0.12	179.4	0.970366	0.926058	0.036971	0.036971	13.61	11.88
28D	G	11	-56.9	-7.5	0.05	59.5	1041657	0.929886	0.035057	0.035057	6.71	11.27
28D	G	12	-58.6	-4.4	0.05	77.1	1007290	0.955863	0.022069	0.022069	6.03	7.12
28D	G	13	-57.9	-6.4	0.1	125.2	0.995904	0.938647	0.030677	0.030677	9.58	9.88
28D	G	14	-57.5	-5.5	0.1	125.4	0.989097	0.946182	0.026909	0.026909	9.13	8.67
28D	G	15	-59.4	-8.1	0.1	125.6	1007946	0.925304	0.037348	0.037348	10.37	12.01
28D	G	16	-58.2	-6.1	0.05	70	1024261	0.941121	0.02944	0.02944	6.64	9.48
28D	G	17	-54.9	-5.9	0.08	129	0.989855	0.942791	0.028605	0.028605	9.54	9.21
28D	G	18	-58.4	-6.1	0.05	73	1022732	0.941121	0.02944	0.02944	6.78	9.48
28D	G	19	-55.5	-2.4	0.1	X		0.974836	0.012582	0.012582		4.07
28D	G	20	-52	-2.7	0.05	56.2	1003582	0.971878	0.014061	0.014061	3.96	4.54
28D	G	21	-47	-7.4	0.05	61.2	1039846	0.930662	0.034669	0.034669	6.76	11.15
28D	G	22	-48.8	-5.4	0.05	62.5	1022236	0.94704	0.02648	0.02648	5.96	8.53
28D	G	23	-51.4	-4.7	0.08	115.3	0.989137	0.95317	0.023415	0.023415	8.12	7.55
28D	G	24	-48.2	-8.1	0.08	63	1044995	0.925304	0.037348	0.037348	7.07	12.01
28D	G	25	-50.7	-4.2	0.08	132	0.974892	0.95768	0.02116	0.02116	8.79	6.83
28D	G	26	-48.9	-7.5	0.1	127.7	1002343	0.929886	0.035057	0.035057	10.23	11.27
28D	G	27	-57	-5.2	0.05	79.3	1012417	0.948769	0.025615	0.025615	6.61	8.26
28D	G	28	-46.6	-9.6	0.1	113	1026691	0.914415	0.042793	0.042793	10.22	13.74
28D	G	29	-47.9	-10.1	0.1	113.8	1029834	0.910954	0.044523	0.044523	10.42	14.29
28D	G	30	-47.5	-8.1	0.1	139.4	0.99913	0.925304	0.037348	0.037348	11.15	12.01
28D	G	31	-59.2	-4.7	0.05	80.7	1007840	0.95317	0.023415	0.023415	6.38	7.55
28D	G	32	-49.2	-7.6	0.1	141.8	0.994034	0.929113	0.035444	0.035444	11.08	11.4
28D	G	33	-55.5	-7.4	0.08	113.8	1010105	0.930662	0.034669	0.034669	9.42	11.15
28D	G	34	-56	-7.5	0.1	140.7	0.994043	0.929886	0.035057	0.035057	10.97	11.27
28D	G	35	-58.2	-8.7	0.1	122.4	1014233	0.920854	0.039573	0.039573	10.43	12.71
28D	G	36	-48.4	-6.1	0.08	84.5	1016761	0.941121	0.02944	0.02944	7.33	9.48
28D	G	37	-58.9	-5.9	0.08	85.3	1014785	0.942791	0.028605	0.028605	7.27	9.21
28D	G	38	-57.6	-10.3	0.05	X		0.909592	0.045204	0.045204		14.5
28D	B	1	-45.1	-6.4	0.1	184.6	0.953992	0.938647	0.030677	0.030677	13.38	9.88
28D	B	2	-51	-5.9	0.1	X		0.942791	0.028605	0.028605		9.21
28D	B	3	-48.9	-4.1	0.2	X		0.958595	0.020702	0.020702		6.68
28D	B	4	-51.6	-2.3	0.08	X		0.97583	0.012085	0.012085		3.91
28D	B	5	-52.8	-3.2	0.09	X		0.967035	0.016483	0.016483		5.32
28D	B	6	-49	-6.5	0.1	136.6	0.98947	0.93783	0.031085	0.031085	10.28	10.01
28D	B	7	-51	-2.9	0.05	112.8	0.97665	0.969928	0.015036	0.015036	6.83	4.86
28D	B	8	-54	-2.6	0.05	111.5	0.975051	0.97286	0.01357	0.01357	6.54	4.38
28D	B	9	-51.5	-5.6	0.12	X		0.945328	0.027336	0.027336		8.81
28D	B	10	-47.2	-6.9	0.1	135.7	0.992966	0.934605	0.032698	0.032698	10.41	10.52
28D	B	11	-52	-4.2	0.08	126.8	0.978247	0.95768	0.02116	0.02116	8.48	6.83
28D	K	1	-51.8	-4.3	0.08	129.6	0.977242	0.956769	0.021615	0.021615	8.71	6.97
28D	K	2	-56.4	-2.5	0.05	112.9	0.973398	0.973846	0.013077	0.013077	6.55	4.23
28D	K	3	-52	-3.5	0.05	100.2	0.988561	0.964181	0.017909	0.017909	6.55	5.78
28D	K	4	-55.7	-4.1	0.08	123.4	0.979604	0.958595	0.020702	0.020702	8.22	6.68
28D	K	5	-50.4	-5.6	0.08	87.2	1011470	0.945327	0.027336	0.027336	7.2	8.81
28D	K	6	-45	-2.6	0.05	106.3	0.978142	0.97286	0.01357	0.01357	6.25	4.38
28D	K	7	-46.8	-3.5	0.1	X		0.964181	0.017909	0.017909		5.78
28D	K	8	-46.9	-6.3	0.07	X		0.939467	0.030266	0.030266		9.74
28D	K	9	-54.4	-6.5	0.05	X		0.93783	0.031085	0.031085		10.01
28D	K	10	-48.1	-7.8	0.08	X		0.927578	0.036211	0.036211		11.64
28D	K	11	-59.4	-4.9	0.08	124.3	0.98523	0.951396	0.024302	0.024302	8.74	7.83
28D	K	12	-57.7	-3.2	0.05	108.9	0.981325	0.967035	0.016483	0.016483	6.82	5.32
28D	K	13	-57	-5.2	0.08	122.3	0.988735	0.948769	0.025615	0.025615	8.79	8.26
28D	K	14	-49.8	-3.8	0.05	90.6	0.995957	0.961368	0.019316	0.019316	6.28	6.23
